# Supplementary material for: Analysis of Molecular Markers by Anatomic Tumor Site in Stage III Colon Carcinomas from Adjuvant Chemotherapy Trial NCCTG N0147 (Alliance)
Source: Oxford University Press journal article supplement (doi:10.1158/1078-0432.ccr-15-0527), 2015-07-17
Supplement: 10780432ccr150527-sup-146101_1_supp_3006859_npfcv8.docx [file 10780432ccr150527-sup-146101_1_supp_3006859_npfcv8.docx]

Supplemental Table e-1: Univariate Cox Proportional Hazards Regression Models for Clinical Factors and Biomarkers (TTR, DFS, and OS)

| **Univariate Models** | | | |
| --- | --- | --- | --- |
| **Parameter** | **DFS: N(Events) HR (95%CI), p** | **OS: N(Events) HR (95%CI), p** | **TTR: N(Events) HR (95%CI), p** |
| **Arm** | 3018 (912) | 3018 (624) | 3018 (811) |
| Arm: FOLFOX+cetuximab vs FOLFOX | 1.04 (0.91-1.19), 0.539 | 1.20 (1.03-1.41), 0.022 | 0.97 (0.85-1.12), 0.680 |
| **Sex** | 3018 (912) | 3018 (624) | 3018 (811) |
| Sex: male vs female | 1.15 (1.01-1.31), 0.041 | 1.23 (1.05-1.45), 0.009 | 1.08 (0.94-1.24), 0.273 |
| **T Stage** | 3017 (912) | 3017 (624) | 3017 (811) |
| T Stage (reference: T1/T2): T3 | 2.74 (2.10-3.58), <.0001 | 2.87 (2.04-4.03), <.0001 | 3.18 (2.35-4.30), <.0001 |
| T Stage (reference: T1/T2): T4 | 4.92 (3.66-6.61), <.0001 | 5.24 (3.62-7.59), <.0001 | 6.05 (4.35-8.41), <.0001 |
| **Histologic Grade** | 3018 (912) | 3018 (624) | 3018 (811) |
| Histologic Grade: high vs low | 1.36 (1.18-1.57), <.0001 | 1.72 (1.46-2.03), <.0001 | 1.38 (1.19-1.61), <.0001 |
| **Nodal Status** | 3018 (912) | 3018 (624) | 3018 (811) |
| Nodal Status: N2 vs N1 | 2.29 (2.01-2.61), <.0001 | 2.56 (2.18-3.00), <.0001 | 2.47 (2.14-2.84), <.0001 |
| **MMR** | 2904 (886) | 2904 (607) | 2904 (787) |
| MMR: dMMR vs pMMR | 1.01 (0.82-1.25), 0.916 | 1.23 (0.98-1.56), 0.079 | 0.89 (0.70-1.12), 0.326 |
| **BRAF** | 2831 (864) | 2831 (592) | 2831 (767) |
| BRAF: mutant vs wild type | 1.34 (1.11-1.61), 0.002 | 1.89 (1.55-2.32), <.0001 | 1.30 (1.07-1.59), 0.009 |
| **KRAS** | 2905 (884) | 2905 (607) | 2905 (784) |
| KRAS: mutant vs wild type | 1.31 (1.15-1.50), <.0001 | 1.27 (1.08-1.49), 0.004 | 1.39 (1.20-1.60), <.0001 |
| **Site** | 2974 (902) | 2974 (617) | 2974 (802) |
| Site: distal vs proximal | 0.72 (0.63-0.82), <.0001 | 0.55 (0.47-0.65), <.0001 | 0.73 (0.64-0.84), <.0001 |
| **BRAF/KRAS** | 2823 (862) | 2823 (590) | 2823 (765) |
| BRAF/KRAS(ref: wtBRAF/wtKRAS): mutKRAS/wtBRAF | 1.46 (1.27-1.69), <.0001 | 1.59 (1.33-1.90), <.0001 | 1.53 (1.31-1.78), <.0001 |
| BRAF/KRAS(ref: wtBRAF/wtKRAS): wtKRAS/mutBRAF | 1.55 (1.27-1.89), <.0001 | 2.29 (1.83-2.86), <.0001 | 1.54 (1.24-1.90), <.0001 |
| **Age** | 3018 (912) | 3018 (624) | 3018 (811) |
| Age (per year) | 1.01 (1.00-1.01), 0.005 | 1.02 (1.01-1.03), <.0001 | 1.00 (1.00-1.01), 0.388 |
